# Supplementary material for: Companion Animals as Potential Reservoirs of Antibiotic Resistant Diarrheagenic Escherichia coli in Shandong, China
Source: MDPI journal article supplement (doi:10.3390/antibiotics11060828), 2022-06-20
Supplement: s1 [file s1]

**Supplementary Materials:**

**Table S1:** Characteristics of the *E. coli* collected from companion animals

| Isolate | Animal | Age/<br>month | Clinical<br>status | Serotype1 | DEC         | ESBL<br>phenotype | Drug resistance<br>spectrum               | Resistance<br>genes                                                                                                                           | Virulence<br>genes                          |
|---------|--------|---------------|--------------------|-----------|-------------|-------------------|-------------------------------------------|-----------------------------------------------------------------------------------------------------------------------------------------------|---------------------------------------------|
| 31-2    | dog    | 2             | diarrhea           | NI        | non-<br>DEC | +                 |                                           | <i>bla</i> <sub>CTX-M</sub>                                                                                                                   | <i>eaeA</i> , <i>irp2</i>                   |
| L86-1   | cat    | 2             | diarrhea           | NI        | non-<br>DEC | +                 | SXT-TET-DOX-<br>AM-AMX-CRO-<br>CEX        | <i>bla</i> <sub>CTX-M</sub> ,<br><i>oqxA</i>                                                                                                  | <i>eaeA</i> , <i>irp2</i>                   |
| 12-3    | cat    | 36            | diarrhea           | NI        | non-<br>DEC | +                 | DOX                                       | <i>bla</i> <sub>SHV</sub> ,<br><i>bla</i> <sub>CTX-M</sub> ,<br><i>aac</i> (6')-Ib-<br><i>cr</i>                                              | <i>irp2</i>                                 |
| 78-1    | dog    | 2             | diarrhea           | O114:K90  | EPEC        | +                 | SXT-TET-DOX-<br>AM-AMX-CRO-<br>CEX        | <i>bla</i> <sub>CTX-M</sub> ,<br><i>aac</i> (6')-Ib-<br><i>cr</i> , <i>oqxA</i> ,<br><i>qnrS</i><br><i>bla</i> <sub>SHV</sub> ,               | <i>eaeA</i> , <i>EAST1</i> ,<br><i>irp2</i> |
| 14-1    | cat    | 24            | healthy            | NI        | non-<br>DEC | +                 | SXT-TET-DOX-<br>GM-AM-AMX-<br>ENR-CRO-CEX | <i>bla</i> <sub>CTX-M</sub> ,<br><i>aaC4</i> , <i>aac</i><br>(6')-Ib- <i>cr</i> ,<br><i>qnrA</i> , <i>qnrB</i><br><i>bla</i> <sub>SHV</sub> , | <i>eaeA</i>                                 |
| 33-2    | cat    | 2             | healthy            | O128:K67  | EPEC        | +                 | AM-AMX-CRO-<br>CEX                        | <i>bla</i> <sub>CTX-M</sub> ,<br><i>aac</i> (6')-Ib-<br><i>cr</i>                                                                             | <i>eaeA</i> , <i>irp2</i>                   |
| 17-1    | cat    | 12            | diarrhea           | NI        | non-<br>DEC | +                 | TET-CEX                                   | <i>bla</i> <sub>SHV</sub>                                                                                                                     | <i>irp2</i>                                 |
| 18      | cat    | 12            | diarrhea           | NI        | non-<br>DEC | +                 | DOX-GM-AM-<br>AMX-CEX                     | <i>bla</i> <sub>CTX-M</sub> ,<br><i>aaC4</i>                                                                                                  | <i>eaeA</i> , <i>irp2</i>                   |
| Y1-1    | dog    | 16            | diarrhea           | NI        | non-<br>DEC | +                 | SXT-TET-DOX-<br>AM-AMX-ENR-<br>CRO-CEX    | <i>bla</i> <sub>CTX-M</sub> ,<br><i>oqxA</i> , <i>qnrS</i>                                                                                    |                                             |
| Y35-1   | dog    | 4             | diarrhea           | NI        | non-<br>DEC | +                 | SXT-TET-DOX-<br>GM-AM-AMX-<br>ENR-CRO-CEX | <i>bla</i> <sub>CTX-M</sub> , <i>aaC4</i> ,<br><i>aac</i> (6')-Ib-<br><i>cr</i> , <i>oqxA</i> ,<br><i>qnrA</i> , <i>qnrS</i>                  | <i>eaeA</i> , <i>irp2</i>                   |
| Y6-3    | dog    | 6             | diarrhea           | NI        | non-<br>DEC | +                 | SXT-TET-DOX-<br>AM-AMX                    | <i>qnrS</i>                                                                                                                                   | <i>irp2</i>                                 |

|        |     |     |          |          |         |   |                                |                                                                                                    |                            |
|--------|-----|-----|----------|----------|---------|---|--------------------------------|----------------------------------------------------------------------------------------------------|----------------------------|
| Y58-1  | cat | 36  | diarrhea | O142:K86 | EPEC    | + | SXT-TET-DOX-AM-AMX-CRO-CEX     | <i>bla</i> <sub>CTX-M</sub> ,<br><i>aaC4</i>                                                       | <i>irp2</i>                |
| Y13-1  | dog | 44  | diarrhea | NI       | non-DEC | + |                                |                                                                                                    |                            |
| Y45-1  | cat | 43  | diarrhea | O128:K67 | EPEC    | + | SXT-TET-DOX-AM-AMX-ENR-CRO-CEX | <i>bla</i> <sub>CTX-M</sub>                                                                        | <i>irp2</i>                |
| Y28-1  | cat | 10  | diarrhea | O8:K40   | ETEC    | + | SXT-TET-DOX-GM-AM-AMX-ENR-CEX  | <i>oqxA</i>                                                                                        | <i>irp2</i>                |
| Y70-3  | dog | 36  | healthy  | NI       | non-DEC | + | TET-DOX-CEX                    | <i>aac(6')-Ib-cr</i> , <i>qnrB</i>                                                                 | <i>irp2</i>                |
| Y102-1 | dog | 36  | healthy  | NI       | non-DEC | + | TET-DOX-AM-AMX-CEX             | <i>bla</i> <sub>CTX-M</sub> ,<br><i>aac(6')-Ib-cr</i><br><i>bla</i> <sub>SHV</sub> ,               | <i>irp2</i>                |
| Y94-1  | dog | 48  | healthy  | NI       | non-DEC | + | TET-GM-AM-AMX-CRO-CEX-FEP      | <i>bla</i> <sub>CTX-M</sub> ,<br><i>aac(6')-Ib-cr</i> , <i>oqxA</i> ,<br><i>qnrB</i> , <i>qnrS</i> | <i>irp2</i>                |
| Y85-2  | dog | 60  | healthy  | O9:K9    | ETEC    | + | TET-GM-AM-AMX-CEX              | <i>bla</i> <sub>CTX-M</sub> ,<br><i>aaC4</i>                                                       | <i>irp2</i>                |
| Y90-1  | dog | 36  | healthy  | NI       | non-DEC | + | AM-AMX                         | <i>bla</i> <sub>SHV</sub> ,<br><i>oqxA</i>                                                         | <i>irp2</i> , <i>EAST1</i> |
| Y95-1  | dog | 120 | healthy  | NI       | non-DEC | + | CEX                            |                                                                                                    | <i>EAST1</i>               |
| Y99-1  | dog | 24  | healthy  | O25:K19  | ETEC    | + | TET-DOX                        | <i>bla</i> <sub>SHV</sub> ,<br><i>bla</i> <sub>CTX-M</sub> ,<br><i>oqxA</i>                        | <i>irp2</i>                |
| Y105-2 | dog | 48  | healthy  | NI       | non-DEC | + | SXT-TET-DOX-AM-AMX-ENR-CEX     | <i>bla</i> <sub>CTX-M</sub> ,<br><i>aaC4</i> ,<br><i>aac(6')-Ib-cr</i> , <i>qnrS</i>               | <i>irp2</i>                |
| Y101-1 | dog | 48  | healthy  | NI       | non-DEC | + |                                |                                                                                                    | <i>irp2</i>                |
| Y98-4  | dog | 12  | healthy  | O7:K1    | ETEC    | + | TET-DOX-GM-AM                  | <i>aaC4</i> ,<br><i>qnrA</i><br><i>bla</i> <sub>SHV</sub> ,                                        | <i>irp2</i>                |
| Y82-1  | dog | 6   | healthy  | NI       | non-DEC | + |                                | <i>bla</i> <sub>CTX-M</sub> ,<br><i>aac(6')-Ib-cr</i> , <i>oqxA</i>                                | <i>irp2</i>                |

|       |     |    |          |          |         |   |                                   |                                                                                                                       |                                             |
|-------|-----|----|----------|----------|---------|---|-----------------------------------|-----------------------------------------------------------------------------------------------------------------------|---------------------------------------------|
| Y88-2 | dog | 24 | healthy  | O25:K19  | ETEC    | + | SXT-TET-DOX-AM-ENR                | <i>bla</i> <sub>CTX-M</sub> ,<br><i>aaC4</i> ,<br><i>aac(6')-Ib-cr</i> , <i>qnrA</i><br><i>bla</i> <sub>CTX-M</sub> , | <i>eaeA</i> , <i>irp2</i>                   |
| Y64-2 | dog | 36 | healthy  | O29:K?   | EIEC    | + | TET-AM-CEX                        | <i>aaC4</i> ,<br><i>aac(6')-Ib-cr</i> , <i>qnrA</i><br><i>bla</i> <sub>CTX-M</sub> ,                                  | <i>eaeA</i> , <i>irp2</i>                   |
| Y41-1 | dog | 48 | healthy  | NI       | non-DEC | + | SXT-TET-DOX-GM-AM-AMX-ENR-CRO-CEX | <i>aaC4</i> ,<br><i>aac(6')-Ib-cr</i> , <i>qnrA</i><br><i>bla</i> <sub>CTX-M</sub> ,                                  | <i>irp2</i>                                 |
| Y54-1 | cat | 12 | healthy  | O78:K80  | ETEC    | + | SXT-TET-DOX-GM-AM-ENR-CEX         | <i>aaC4</i> ,<br><i>aac(6')-Ib-cr</i> , <i>oqxA</i> ,<br><i>qnrS</i>                                                  | <i>eaeA</i> , <i>irp2</i> ,<br><i>EAST1</i> |
| Y43-1 | cat | 10 | diarrhea | NI       |         | + | SXT-TET-DOX-AM-AMX-ENR-CRO-CEX    | <i>oqxA</i> , <i>qnrS</i>                                                                                             | <i>irp2</i>                                 |
| Y27-1 | cat | 10 | diarrhea | O8:K40   | ETEC    | + | TET-DOX                           | <i>bla</i> <sub>SHV</sub>                                                                                             |                                             |
| Y33-1 | dog | 48 | healthy  | NI       |         | + | TET-DOX-CEX                       | <i>aac(6')-Ib-cr</i> , <i>oqxA</i>                                                                                    | <i>eaeA</i> , <i>irp2</i>                   |
| Y24-1 | dog | 3  | healthy  | O124:K72 | EIEC    | + | TET-DOX                           | <i>oqxA</i>                                                                                                           | <i>eaeA</i> , <i>irp2</i>                   |
| Y81-2 | dog | 72 | healthy  | NI       | non-DEC | - | SXT-TET-AM-AMX-ENR                | <i>bla</i> <sub>SHV</sub> ,<br><i>aac(6')-Ib-cr</i> , <i>oqxA</i> ,<br><i>qnrS</i>                                    | <i>irp2</i>                                 |
| Y83-1 | dog | 36 | healthy  | NI       | non-DEC | - | TET-DOX-AMX-CEX                   | <i>bla</i> <sub>SHV</sub> ,<br><i>aac(6')-Ib-cr</i> , <i>qnrA</i> ,<br><i>qnrB</i>                                    | <i>irp2</i>                                 |
| Y80-1 | cat | 60 | healthy  | NI       | non-DEC | - | ENR                               | <i>bla</i> <sub>CTX-M</sub> ,<br><i>aac(6')-Ib-cr</i>                                                                 | <i>irp2</i> , <i>F17</i>                    |
| L91-1 | cat | 18 | diarrhea | O6:K15   | ETEC    | - | DOX-GM-AMX                        | <i>bla</i> <sub>SHV</sub> ,<br><i>bla</i> <sub>SHV</sub> ,<br><i>bla</i> <sub>CTX-M</sub> ,                           | <i>irp2</i>                                 |
| 11-1  | cat | 6  | diarrhea | O78:K80  | ETEC    | - | TET-AM-AMX                        | <i>aaC4</i> ,<br><i>aac(6')-Ib-cr</i> , <i>oqxA</i>                                                                   | <i>eaeA</i> , <i>irp2</i>                   |
| 71-5  | dog | 2  | diarrhea | NI       | non-DEC | - |                                   | <i>bla</i> <sub>SHV</sub> ,<br><i>aaC4</i> ,                                                                          | <i>eaeA</i> , <i>irp2</i>                   |

|       |     |    |          |          |         |   |                               |                                                                                                                                       |                   |
|-------|-----|----|----------|----------|---------|---|-------------------------------|---------------------------------------------------------------------------------------------------------------------------------------|-------------------|
| 118-2 | dog | 24 | diarrhea | O25:K19  | ETEC    | - | SXT-TET-DOX                   | <i>aac(6')-Ib-cr, oqxA</i><br><i>bla<sub>SHV</sub>,</i><br><i>aaC4,</i><br><i>aac(6')-Ib-cr, qnrA</i>                                 | <i>eaeA, irp2</i> |
| 16-2  | dog | 11 | diarrhea | NI       | non-DEC | - | DOX                           |                                                                                                                                       |                   |
| 20-1  | cat | 36 | healthy  | NI       | non-DEC | - | DOX-CEX                       | <i>bla<sub>CTX-M</sub>,</i><br><i>oxxA, qnrS</i>                                                                                      | <i>irp2</i>       |
| 15    | dog | 2  | diarrhea | NI       | non-DEC | - | DOX-GM-AM-AMX-CRO-CEX         | <i>bla<sub>CTX-M</sub>,</i><br><i>aac(6')-Ib-cr</i>                                                                                   | <i>eaeA, irp2</i> |
| 10    | cat | 48 | diarrhea | O114:K90 | EPEC    | - | SXT-TET-GM-AM-AMX-CRO-CEX     | <i>bla<sub>SHV</sub>,</i><br><i>bla<sub>CTX-M</sub>,</i><br><i>aac(6')-Ib-cr, qnrB</i>                                                | <i>eaeA</i>       |
| 6     | cat | 18 | healthy  | NI       | non-DEC | - | SXT-TET-AM-AMX-ENR-CEX        | <i>bla<sub>SHV</sub></i>                                                                                                              | <i>irp2</i>       |
| 13    | cat | 30 | healthy  | NI       | non-DEC | - | GM-AM-AMX-CRO-CEX             | <i>bla<sub>SHV</sub>,</i><br><i>bla<sub>CTX-M</sub></i>                                                                               | <i>eaeA</i>       |
| 4     | cat | 42 | healthy  | NI       | non-DEC | - | AM-AMX-CEX                    | <i>oxxA</i>                                                                                                                           | <i>eaeA</i>       |
| Y3-1  | dog | 2  | diarrhea | O6:K15   | ETEC    | - |                               | <i>bla<sub>CTX-M</sub>,</i><br><i>aaC4,</i><br><i>aac(6')-Ib-cr</i>                                                                   | <i>eaeA, irp2</i> |
| Y8-1  | dog | 12 | diarrhea | NI       | non-DEC | - | TET-ENR                       | <i>bla<sub>SHV</sub>,</i><br><i>bla<sub>CTX-M</sub>,</i><br><i>aac(6')-Ib-cr, qnrB</i><br><i>bla<sub>CTX-M</sub>,</i><br><i>aaC4,</i> | <i>irp2</i>       |
| Y20-1 | dog | 48 | diarrhea | NI       | non-DEC | - | DOX-GM                        | <i>aac(6')-Ib-cr, oqxA,</i><br><i>qnrS</i>                                                                                            | <i>irp2</i>       |
| Y40-1 | dog | 96 | diarrhea | O25:K19  | ETEC    | - | TET-GM-AM-AMX-CEX             | <i>bla<sub>SHV</sub>,</i><br><i>bla<sub>CTX-M</sub></i>                                                                               | <i>eaeA, irp2</i> |
| Y17-1 | dog | 3  | diarrhea | O6:K15   | ETEC    | - | SXT-TET-DOX-GM-AM-AMX-ENR-CEX | <i>bla<sub>CTX-M</sub>,</i><br><i>aac(6')-Ib-cr, oqxA,</i><br><i>qnrS</i>                                                             | <i>irp2</i>       |

|        |     |     |          |          |         |   |                                   |                                                                          |                          |
|--------|-----|-----|----------|----------|---------|---|-----------------------------------|--------------------------------------------------------------------------|--------------------------|
| Y31-1  | cat | 16  | healthy  | O6:K15   | ETEC    | - | SXT-TET-DOX-GM-AM-AMX-CEX         | <i>bla<sub>SHV</sub>, bla<sub>CTX-M</sub>, oqxA</i>                      | <i>irp2</i>              |
| Y12-1  | cat | 10  | diarrhea | O78:K80  | ETEC    | - | TET                               | <i>bla<sub>CTX-M</sub></i>                                               | <i>irp2</i>              |
| Y18-1  | cat | 8   | healthy  | O78:K80  | ETEC    | - | AM-AMX                            | <i>bla<sub>CTX-M</sub></i>                                               | <i>irp2</i>              |
| Y5-2   | dog | 24  | diarrhea | NI       | non-DEC | - | TET-AMX                           |                                                                          | <i>irp2</i>              |
| Y37-1  | cat | 36  | healthy  | O6:K15   | ETEC    | - | DOX                               | <i>bla<sub>CTX-M</sub>, aac(6')-Ib-cr, oqxA</i>                          | <i>eaeA, irp2</i>        |
| Y14-1  | cat | 10  | diarrhea | NI       | non-DEC | - | TET-AM-AMX-ENR-CRO-FEP            | <i>bla<sub>CTX-M</sub></i>                                               | <i>irp2</i>              |
| Y22-2  | dog | 168 | diarrhea | NI       | non-DEC | - | AMX                               |                                                                          | <i>eaeA, irp2</i>        |
| Y9-1   | cat | 12  | diarrhea | O8:K40   | ETEC    | - |                                   | <i>aac(6')-Ib-cr</i>                                                     | <i>eaeA, irp2</i>        |
| Y16-1  | cat | 16  | diarrhea | NI       | non-DEC | - | SXT-TET-DOX-GM-AM-AMX-ENR-CRO-CEX | <i>bla<sub>SHV</sub>, bla<sub>CTX-M</sub>, oqxA</i>                      | <i>eaeA, EAST1, irp2</i> |
| Y65-2  | dog | 36  | healthy  | NI       | non-DEC | - | TET-DOX-AM-AMX                    | <i>bla<sub>CTX-M</sub></i>                                               | <i>irp2</i>              |
| Y79-1  | dog | 24  | healthy  | O20:K17  | ETEC    | - | TET-AM-CEX                        | <i>bla<sub>CTX-M</sub>, aaC4, aac(6')-Ib-cr, oqxA</i>                    | <i>irp2</i>              |
| Y120-1 | dog | 60  | healthy  | NI       | non-DEC | - | SXT-TET-DOX-GM-AM-AMX-ENR-CEX     | <i>bla<sub>SHV</sub>, bla<sub>CTX-M</sub>, oqxA, qnrS</i>                | <i>irp2</i>              |
| Y76-1  | dog | 24  | healthy  | NI       | non-DEC | - | TET-DOX                           | <i>bla<sub>SHV</sub>, bla<sub>CTX-M</sub></i>                            | <i>irp2</i>              |
| Y112-2 | dog | 96  | healthy  | O114:K90 | EPEC    | - | TET-DOX                           | <i>bla<sub>SHV</sub>, oqxA</i>                                           | <i>irp2</i>              |
| Y62-3  | dog | 6   | healthy  | O6:K15   | ETEC    | - | SXT-TET-DOX-GM-AM-AMX             | <i>bla<sub>SHV</sub>, bla<sub>CTX-M</sub>, oqxA, qnrS</i>                | <i>irp2</i>              |
| Y74-3  | dog | 24  | healthy  | O125:K70 | EPEC    | - | SXT-TET-DOX-AM-AMX                | <i>qnrS</i>                                                              | <i>irp2</i>              |
| Y84-1  | dog | 48  | healthy  | O25:K19  | ETEC    | - | SXT-TET-DOX-GM-AM-CEX             | <i>bla<sub>SHV</sub>, oqxA</i>                                           |                          |
| Y114-1 | dog | 16  | healthy  | O125:K70 | EPEC    | - | SXT-TET-DOX-GM-AM-AMX-ENR-CRO-CEX | <i>bla<sub>SHV</sub>, bla<sub>CTX-M</sub>, aaC4, aac(6')-Ib-cr, qnrA</i> | <i>irp2</i>              |

|       |     |     |          |        |         |   |                 |                                                                                        |                        |
|-------|-----|-----|----------|--------|---------|---|-----------------|----------------------------------------------------------------------------------------|------------------------|
| Y73-3 | dog | 72  | healthy  | O8:K40 | ETEC    | - | CRO             | <i>bla<sub>SHV</sub>,</i><br><i>bla<sub>CTX-M</sub></i>                                | <i>irp2</i>            |
| Y72-3 | dog | 12  | healthy  | NI     | non-DEC | - | SXT-TET-DOX     | <i>bla<sub>SHV</sub>,</i><br><i>bla<sub>CTX-M</sub>,</i><br><i>aac(6')-Ib-cr, oqxA</i> | <i>eaeA, irp2, F17</i> |
| Y71-3 | dog | 4   | healthy  | NI     | non-DEC | - | SXT-TET-DOX-CEX | <i>aaC4,</i><br><i>aac(6')-Ib-cr</i>                                                   | <i>irp2</i>            |
| Y92-1 | dog | 36  | healthy  | O6:K15 | ETEC    | - |                 |                                                                                        | <i>irp2</i>            |
| Y32-1 | dog | 168 | diarrhea | O15:K? | ETEC    | - | DOX             | <i>bla<sub>SHV</sub>,</i><br><i>bla<sub>CTX-M</sub>,</i><br><i>oqxA</i>                | <i>irp2</i>            |
| Y15-1 | dog | 2   | diarrhea | O6:K15 | ETEC    | - |                 | <i>bla<sub>CTX-M</sub>,</i><br><i>aaC4,</i><br><i>aac(6')-Ib-cr</i>                    | <i>irp2</i>            |
| Y23-1 | dog | 16  | healthy  | NI     | non-DEC | - | TET-DOX         | <i>bla<sub>CTX-M</sub>,</i><br><i>aac(6')-Ib-cr, oqxA</i>                              | <i>eaeA, irp2</i>      |
| Y60-1 | dog | 3   | healthy  | O8:K40 | ETEC    | - | DOX-CEX         | <i>oqxA</i>                                                                            | <i>eaeA, irp2</i>      |

<sup>1</sup> NI: no identification; +: ESBL producing isolates; -: non-ESBL producing isolates
